# Supplementary material for: Clinical evolution of ST11 carbapenem resistant and hypervirulent Klebsiella pneumoniae
Source: PubMed Central journal article supplement (PMC8169677; doi:10.1038/s42003-021-02148-4), 2021-06-01
Supplement: 42003_2021_2148_MOESM2_ESM.pdf [file 42003_2021_2148_MOESM2_ESM.pdf]

1 Supplementary Materials

2  
3 **Clinical evolution of ST11 carbapenem resistant and hypervirulent *Klebsiella pneumoniae***

4  
5  
6 Miaomiao Xie<sup>1#</sup>, Xuemei Yang<sup>1#</sup>, Qi Xu<sup>1</sup>, Lianwei Ye<sup>1</sup>, Kaichao Chen<sup>1</sup>, Zhiwei Zheng<sup>1</sup>, Ning  
7 Dong<sup>1</sup>, Qiaoling Sun<sup>2</sup>, Lingbin Shu<sup>2</sup>, Danxia Gu<sup>3</sup>, Edward Wai-Chi Chan<sup>1,4</sup>, Rong Zhang<sup>2\*</sup>,  
8 Sheng Chen<sup>1\*</sup>

9  
10 Running title: Conjugative MDR and hypervirulent plasmid

11 <sup>1</sup>Department of Infectious Diseases and Public Health, Jockey Club College of Veterinary  
12 Medicine and Life Sciences, City University of Hong Kong, Kowloon, Hong Kong.

13 <sup>2</sup> Department of Clinical Laboratory, Second Affiliated Hospital of Zhejiang University, School  
14 of Medicine, Zhejiang, Hangzhou, China.

15 <sup>3</sup> Department of Clinical Laboratory, Zhejiang Provincial People's Hospital, Hangzhou, China.

16 <sup>4</sup> State Key Lab of Chemical Biology and Drug Discovery, Department of Applied Biology and  
17 Chemical Technology, The Hong Kong Polytechnic University, Hung Hom, Kowloon, Hong  
18 Kong.

19 # These authors contributed equally.

20 Corresponding author: Sheng Chen, Email: [shechen@cityu.edu.hk](mailto:shechen@cityu.edu.hk) from City University of Hong  
21 Kong, Kowloon, Hong Kong; Rong Zhang, Email: [zhang-rong@zju.edu.cn](mailto:zhang-rong@zju.edu.cn), Second Affiliated  
22 Hospital of Zhejiang University, School of Medicine, Zhejiang, Hangzhou, China.

24 **Supplementary Table S1. Bacterial strains carrying *bla*<sub>KPC-2</sub>-bearing plasmid p17ZR-91-KPC obtained from two hospitals in**  
 25 **China and the GenBank.**

| <i>bla</i> <sub>KPC</sub> -bearing plasmid | Virulence plasmid | Chromosome      | Species                           | ST     | K_locus | Country  | Date | Source                          |
|--------------------------------------------|-------------------|-----------------|-----------------------------------|--------|---------|----------|------|---------------------------------|
| MK262711.1                                 | -                 | CP034249.1      | <i>Klebsiella pneumoniae</i>      | ST11   | KL112   | China    | 2018 | urine                           |
| KC757417.2                                 | -                 | NA              | <i>Klebsiella pneumoniae</i>      | NA     | NA      | France   | 2010 | NA                              |
| MK158080.1                                 | -                 | NA              | <i>Klebsiella pneumoniae</i>      | NA     | NA      | China    | NA   | urine                           |
| AP018584.1                                 | -                 | GCA_003115215.1 | <i>Klebsiella pneumoniae</i>      | ST15   | KL62    | Viet Nam | 2016 | NA                              |
| AP018830.1                                 | -                 | NA              | <i>Enterobacter hormaechei</i>    | NA     | NA      | Myanmar  | 2015 | NA                              |
| CP014005.1                                 | -                 | CP014004.1      | <i>Klebsiella pneumoniae</i>      | ST14   | KL2     | China    | 2014 | urine                           |
| CP017386.1                                 | -                 | CP017385.1      | <i>Klebsiella pneumoniae</i>      | ST15   | KL64    | Taiwan   | 2007 | urine                           |
| CP021959.1                                 | -                 | CP021960.1      | <i>Klebsiella pneumoniae</i>      | ST37   | KL105   | NA       | NA   | NA                              |
| CP024876.1                                 | -                 | CP024874.1      | <i>Klebsiella pneumoniae</i>      | ST15   | KL19    | Thailand | 2016 | sputum                          |
| CP024917.1                                 | -                 | CP024916.1      | <i>Klebsiella pneumoniae</i>      | ST147  | KL10    | Thailand | 2016 | rectal swab                     |
| CP025966.2                                 | -                 | CP025963.2      | <i>Klebsiella pneumoniae</i>      | ST273  | KL15    | China    | 2017 | NA                              |
| CP026588.1                                 | +<br>(CP026587.1) | CP026586.1      | <i>Klebsiella pneumoniae</i>      | ST86   | KL2     | China    | 2016 | NA                              |
| CP028389.2                                 | +<br>(CP028390.1) | CP028391.1      | <i>Klebsiella pneumoniae</i>      | ST36   | KL62    | China    | 2015 | NA                              |
| CP028553.1                                 | -                 | CP028555.1      | <i>Klebsiella variicola</i>       | ST1142 | KL105   | China    | 2016 | NA                              |
| CP028717.1                                 | -                 | CP028716.1      | <i>Klebsiella pneumoniae</i>      | ST15   | KL28    | China    | 2017 | Sputum                          |
| CP034085.1<br>(pR210-2-CTX)                | +<br>(CP034083.1) | CP034082.1      | <i>Klebsiella pneumoniae</i>      | ST23   | KL1     | China    | 2015 | NA                              |
| HF545434.1                                 | -                 | NA              | <i>Klebsiella pneumoniae</i>      | NA     | NA      | Viet Nam | 2006 | nasal swab                      |
| KP987218.1                                 | -                 | NA              | <i>Klebsiella pneumoniae</i>      | NA     | NA      | China    | 2010 | cerebrospinal<br>fluid specimen |
| LT968762.1                                 | -                 | NA              | <i>Klebsiella pneumoniae</i>      | NA     | NA      | China    | 2009 | specimen                        |
| MG878868.1                                 | -                 | NA              | <i>Klebsiella pneumoniae</i>      | NA     | NA      | Taiwan   | 2013 | wound                           |
| CP035124.1                                 | -                 | CP035123.1      | <i>Escherichia coli</i>           | -      | -       | China    | 2017 | urine                           |
| CP018340.1                                 | -                 | CP018337.1      | <i>Klebsiella pneumoniae</i>      | ST23   | KL57    | Germany  | 2014 | wound                           |
| CP022442.1                                 | -                 | CP022444.1      | <i>Klebsiella quasipneumoniae</i> | ST421  | KL123   | China    | NA   | plant                           |
| CP024510.1                                 | -                 | CP024504.1      | <i>Klebsiella pneumoniae</i>      | ST323  | KL21    | NA       | NA   | NA                              |
| CP031262.1                                 | -                 | CP031257.1      | <i>Klebsiella quasipneumoniae</i> | ST367  | KL1     | China    | 2014 | bronchoalveolar<br>lavage fluid |

|            |   |                 |                              |          |       |       |      |             |
|------------|---|-----------------|------------------------------|----------|-------|-------|------|-------------|
| CP035384.1 | - | CP035383.1      | <i>Klebsiella pneumoniae</i> | ST23     | KL1   | China | 2017 | blood       |
| FJ876826.1 | - | NA              | <i>Klebsiella pneumoniae</i> | NA       | NA    | China | NA   | NA          |
| CP035776.1 | - | CP035777.1      | <i>Klebsiella pneumoniae</i> | ST37-1LV | KL14  | China | 2015 | rabbit      |
| CP003224.1 | - | CP003200.1      | <i>Klebsiella pneumoniae</i> | ST11     | KL103 | China | 2011 | sputum      |
| CP025468.1 | - | CP025466.1      | <i>Klebsiella pneumoniae</i> | ST11     | KL103 | China | 2008 | NA          |
| CP021195.1 | - | CP021193.1      | <i>Escherichia coli</i>      | -        | -     | China | 2012 | NA          |
| CP018999.1 | - | CP019000.1      | <i>Escherichia coli</i>      | -        | -     | China | 2013 | NA          |
| KU295132.1 | - | NA              | <i>Escherichia coli</i>      | NA       | NA    | USA   | NA   | rectum swab |
| KY270849.1 | - | NA              | <i>Klebsiella pneumoniae</i> | NA       | NA    | China | NA   | NA          |
| KX236178.1 | - | NA              | <i>Klebsiella pneumoniae</i> | NA       | NA    | China | 2009 | sputum      |
| MG764550.1 | - | CP022997.1      | <i>Klebsiella pneumoniae</i> | ST11     | KL47  | China | NA   | NA          |
| MH477636.1 | - | NA              | <i>Klebsiella pneumoniae</i> | NA       | NA    | China | 2013 | NA          |
| MH909340.1 | - | GCF_002751155.1 | <i>Klebsiella pneumoniae</i> | ST11     | KL47  | China | 2013 | NA          |
| MH917122.1 | - | GCF_003225855.1 | <i>Klebsiella pneumoniae</i> | ST628    | KL2   | USA   | 2015 | sputum      |
| MK183753.1 | - | CP034076.1      | <i>Klebsiella pneumoniae</i> | ST15     | KL19  | China | NA   | blood       |
| MK191023.1 | - | CP034077.1      | <i>Klebsiella pneumoniae</i> | ST15     | KL19  | China | 2017 | Sputum      |
| LR596806.1 | - | LR596806.1      | <i>Klebsiella pneumoniae</i> | ST11     | KL31  | UK    | NA   | NA          |
| 17ZR-127   | + | RYML00000000    | <i>Klebsiella pneumoniae</i> | ST11     | KL64  | ZR    | 2017 | blood       |
| 17ZR-133   | - | RYKN00000000    | <i>Klebsiella pneumoniae</i> | ST15     | KL19  | ZR    | 2017 | blood       |
| 17ZR-141   | - | RYIT00000000    | <i>Klebsiella pneumoniae</i> | ST15     | KL19  | ZR    | 2017 | sputum      |
| 17ZR-175   | - | RYIQ00000000    | <i>Klebsiella pneumoniae</i> | ST15     | KL19  | ZR    | 2017 | blood       |
| 17ZR-2     | - | RYIM00000000    | <i>Klebsiella pneumoniae</i> | ST15     | KL19  | ZR    | 2017 | sputum      |
| 17ZR-31    | + | RYHQ00000000    | <i>Klebsiella pneumoniae</i> | ST86     | KL2   | ZR    | 2017 | sputum      |
| 17ZR-84    | + | RYHP00000000    | <i>Klebsiella pneumoniae</i> | ST86     | KL2   | ZR    | 2017 | sputum      |
| 17ZR-91    | - | RYGB00000000    | <i>Klebsiella pneumoniae</i> | ST86     | KL2   | ZR    | 2017 | sputum      |

27 **Supplementary Table S2. SNPs of *K. pneumoniae* strains carrying both p17ZR-91-Vir and**  
 28 **p17ZR-91-KPC plasmid collected from a hospital in Zhejiang Province, China.**

|                      | 29             |                |                |                 |                  |
|----------------------|----------------|----------------|----------------|-----------------|------------------|
| <b>SNP-dists 0.6</b> | <b>17ZR-31</b> | <b>17ZR-84</b> | <b>17ZR-91</b> | <b>17ZR-127</b> | <b>Reference</b> |
| <b>17ZR-31</b>       | 0              | 8717           | 8714           | 20094           | 20377            |
| <b>17ZR-84</b>       | 8717           | 0              | 23             | 28712           | 29094            |
| <b>17ZR-91</b>       | 8714           | 23             | 0              | 28702           | 29083            |
| <b>17ZR-127</b>      | 20094          | 28712          | 28702          | 0               | 4118             |
| <b>Reference</b>     | 20377          | 29094          | 29083          | 4118            | 0                |

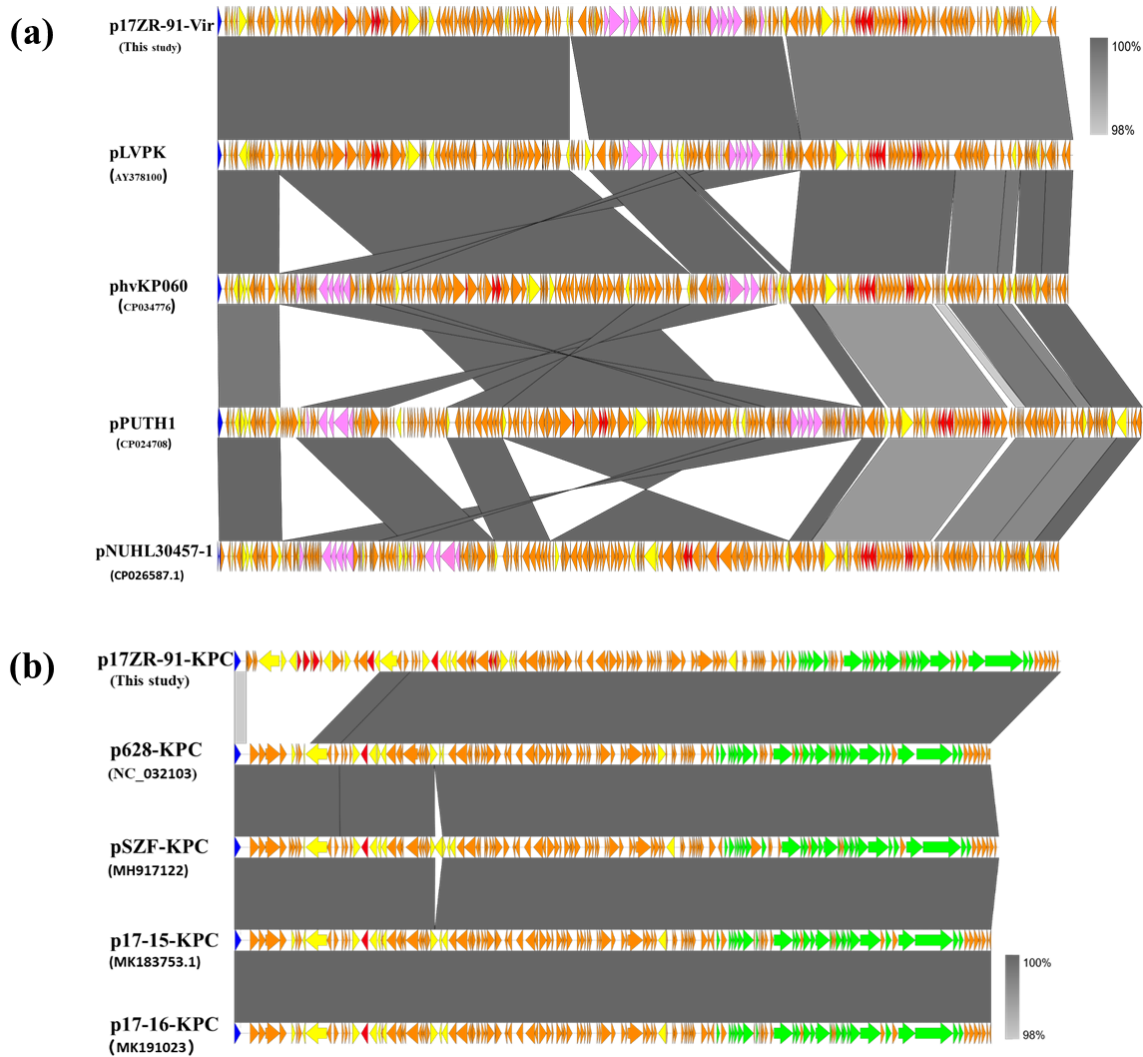

31

32 **Supplementary Figure S1. Alignment of virulence plasmid p17ZR-91-Vir and *bla*<sub>KPC-2</sub>-**  
 33 **bearing plasmid p17ZR-91-KPC recovered from *K. pneumoniae* 17ZR-91 with similar**  
 34 **plasmids in the NCBI database, respectively. (a) Alignment of virulence plasmid p17ZR-91-**  
 35 **Vir with pLVPK (AY378100), phvKP060 (CP034776), pPUTh1(CP024708) and pNUHL30457-**  
 36 **1(CP026587.1) using Easyfig. (b) Alignment of *bla*<sub>KPC-2</sub>-bearing plasmid p17ZR-91-KPC with**  
 37 **p628-kpc (NC\_032103), pSZF-KPC (MH917122), p17-15-KPC (MK183753) and p17-16-**  
 38 **KPC(MK191023) using Easyfig.**

39

```

HR1 AGATCCGAAAAAAGCTAGTTCCGGATCTGCTTCAGCCCCGCCGACGCGCAGCGTCCAAAA 60
HR2 AGATCCGAAAAAAGGTAGTTCCGGATCTGCCGGAACGGCTCCGGCGCGCAGCGGCCCGGC 60
*****
***** * * * * * ***** **

HR1 AACACAAGATGTAGCGGTGTTCCAGCTGACAGTGACGCTATATGTTGTGTCTCTCCCCT 120
HR2 AACACAAGATGTAGCGGTGTTCCCAGCTGAGGATGACGCTATATGTTGTGTCCCTCCCCT 120
*****
***** ***** *****

HR1 GCCCTGCGACCGGCCTCTCACCACCCTAAAAGGACGCTTTGCTTATTCCCTGGCCGTGGT 180
HR2 CCCCCGTGACCGGCCGCTCACCACCGGAAAACGCCGCTTTGCTTATTCTCTCACCGTGGT 180
*** * ***** ***** ***** * ***** ** *****

HR1 ACACTTCCGAAACTTCGCTAAATGTGAAAAGTCGGATCTGCCGAAACGGTCATCCGAT 240
HR2 ACACTTCCGAAACTTCGTAAAGCGCGAAAAGTCGGATCCGGACGGAACGGCCGTCCTGT 240
*****
***** * * ***** * * ***** * ** *

HR1 AATTTAATAGCGTGGTTATAATGCTGCTTATTATC 275
HR2 AATTTAACGGCGTGGCTGTATGGCTGCTTGTATC 275
***** ***** * ** ***** *****

```

40

41 **Supplementary Figure S2. DNA sequence alignment for 275bp homologous regions, HR1**  
42 **and HR2, located in plasmids p17ZR-91-Vir and p17ZR-91-KPC.** Sequence alignment were  
43 conducted using multiple sequence alignment tool, Clustal Omega. These two sequences shared  
44 82% (224/275) homology.

45

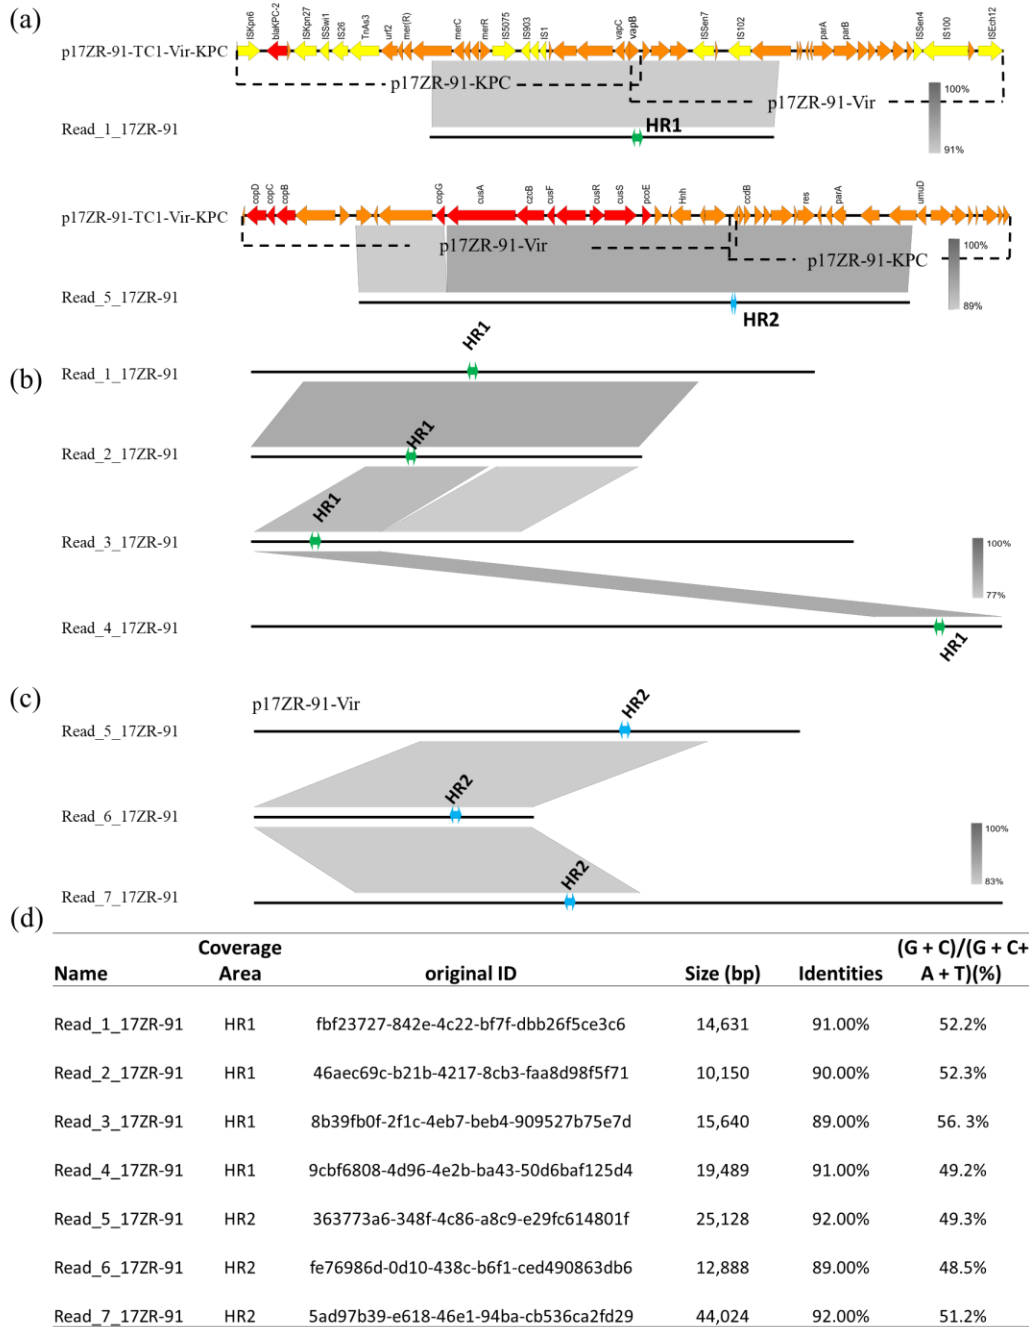

46

47 **Supplementary Figure S3. Nanopore reads covering the fusion region of fusion plasmid**  
 48 **p17ZR-91-Vir-KPC.** (a) Linear alignment between part of p17ZR-91-Vir-KPC and the Nanopore  
 49 long-read Read\_1\_17ZR-91 at HR1 region and Read\_5\_17ZR-91 at HR2 region. Linear alignment  
 50 among different Nanopore reads that containing HR1 (b) or HR2 (c) parts of fusion plasmid. (d)  
 51 detail information of 7 reads.

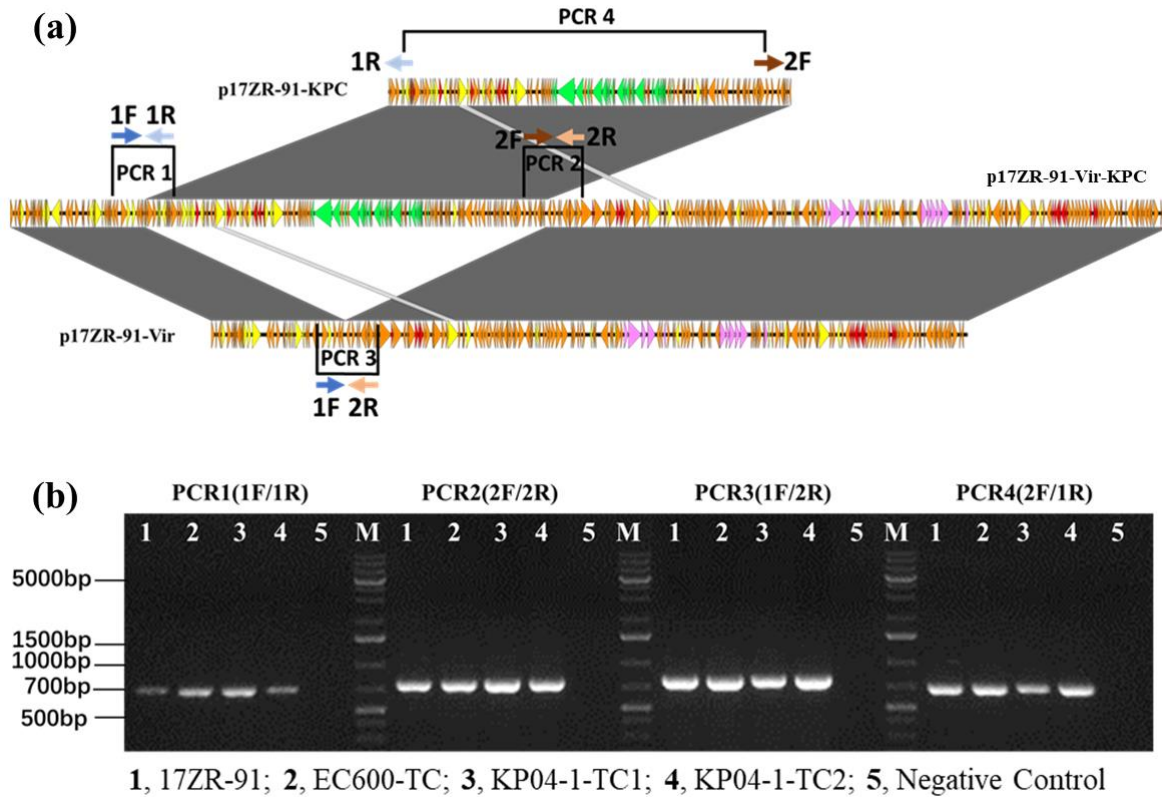

52

53 **Supplementary Figure S4. PCR assays to confirm the presence of fusion plasmid p17ZR-91-**  
 54 **Vir-KPC in different *K. pneumoniae* strains and transconjugants.** (a) Design of PCR assays to  
 55 test the presence of fusion plasmid and two non-fusion plasmids in *K. pneumoniae*. PCR1 and  
 56 PCR2 were designed to confirm the presence of fusion plasmid p17ZR-91-Vir-KPC; PCR3 was  
 57 designed to confirm the presence of p17ZR-91-Vir; PCR4 was designed to confirm the presence  
 58 of p17ZR-91-KPC. (b) PCR results for different *K. pneumoniae* strains and transconjugants. Being  
 59 positive in all the four PCR tests indicates the presence of fusion plasmid and two non-fusion  
 60 plasmids in the same strain.

61



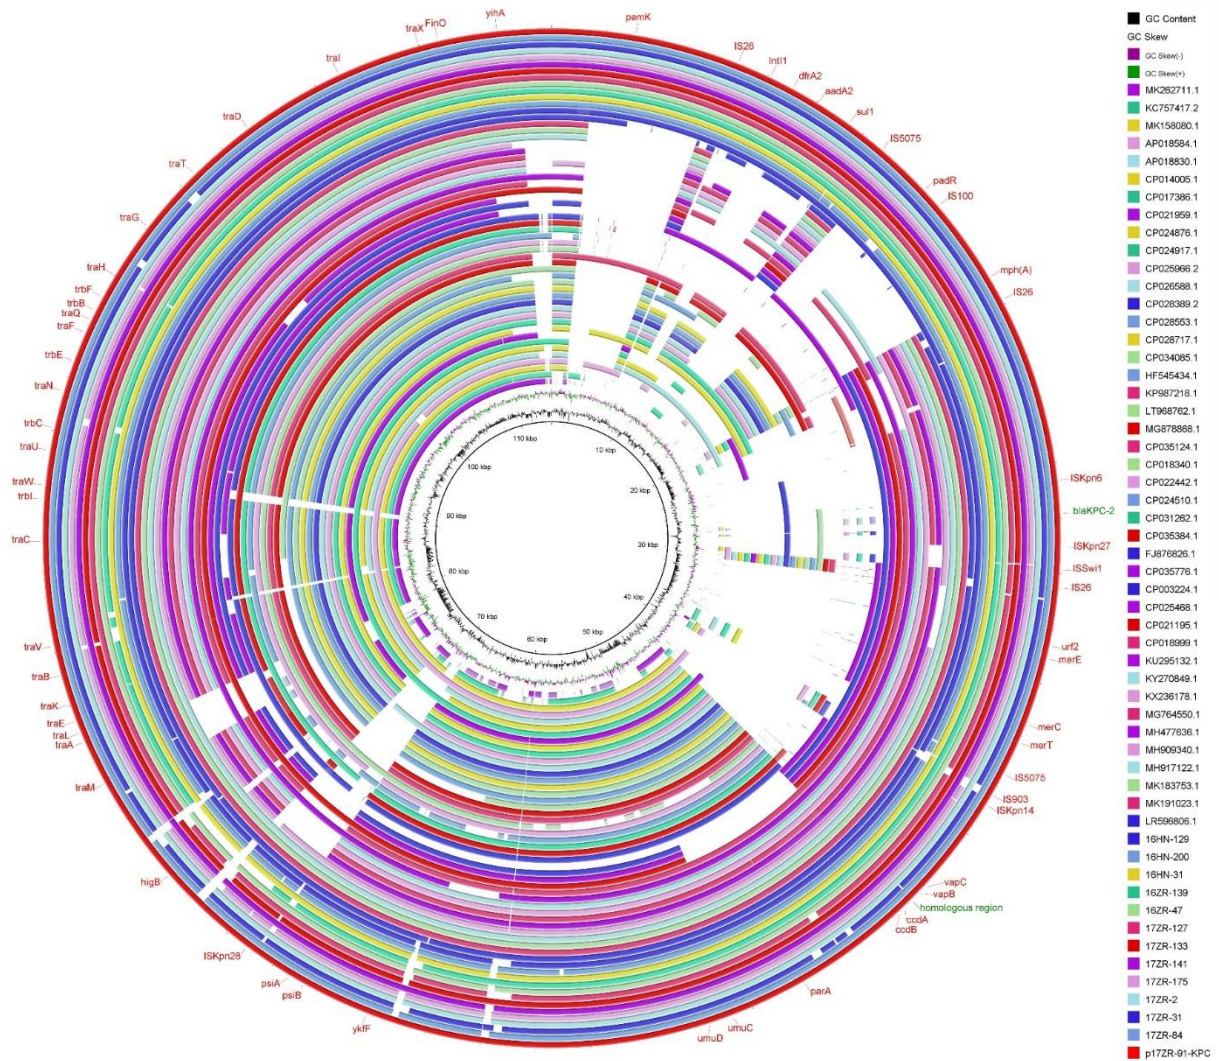

63

64 **Supplementary Figure S5. Alignment of the *bla*<sub>KPC-2</sub>-bearing plasmid harbored by 17ZR-91,**  
 65 **p17ZR-91-KPC, with other related plasmids recovered from strains in two hospitals in China,**  
 66 **and those retrieved from the GenBank. The alignment was performed using BLAST Ring Image**  
 67 **Generator (BRIG). Other information of these strains was shown in Supplementary Table S1.**  
 68 **Homologous region (HR) was labelled.**

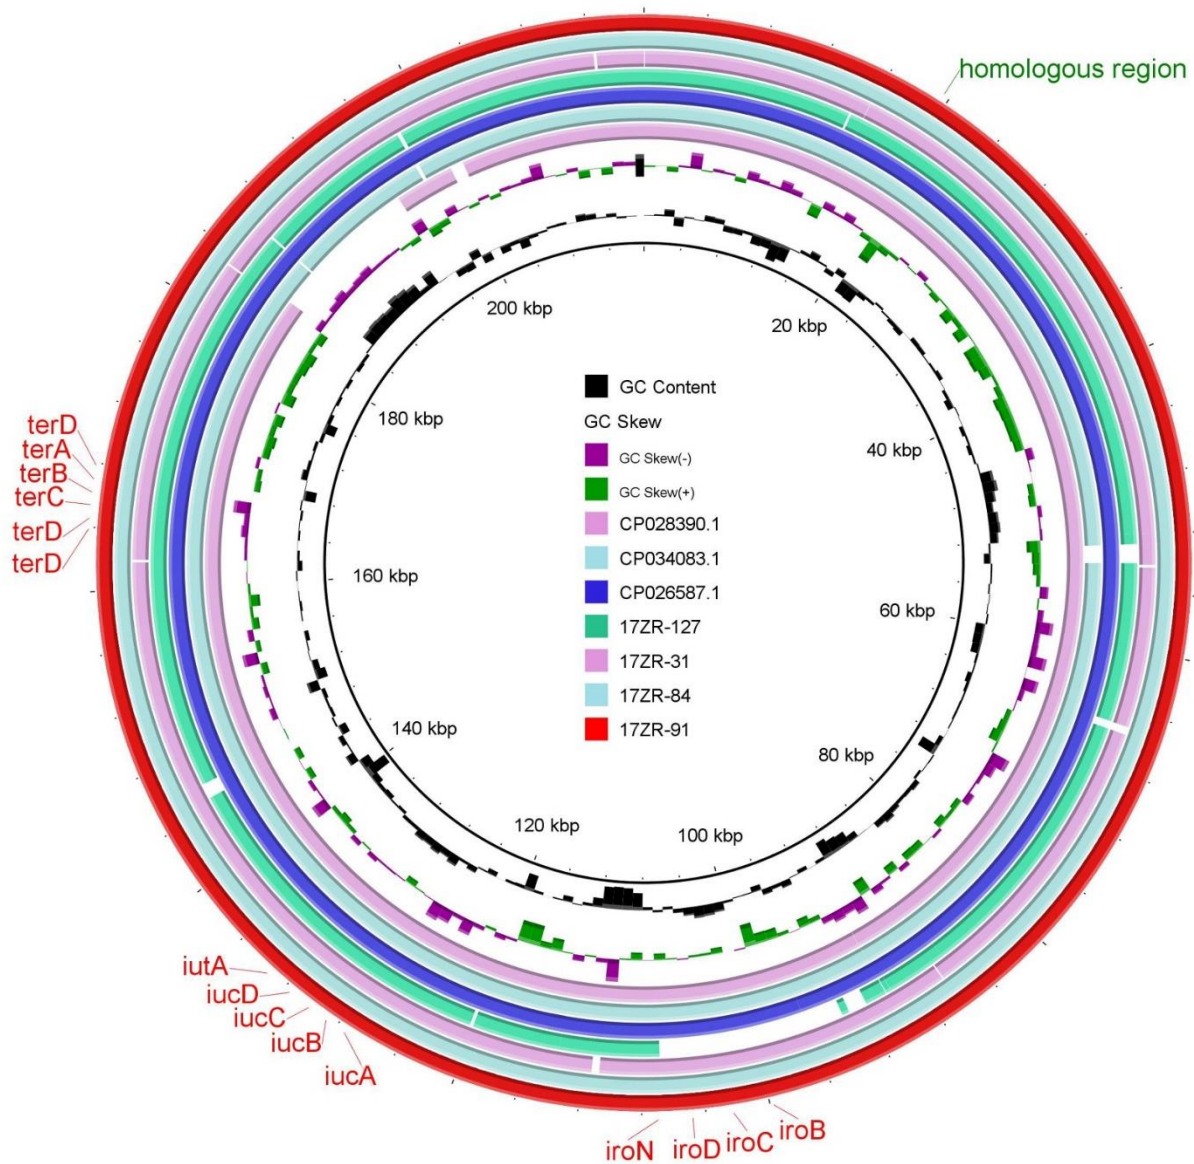

69

70 **Supplementary Figure S6. Alignment of virulence plasmid from 17ZR-91, p17ZR-91-Vir,**  
 71 **with other virulence plasmids from bacterial strains that contained p17ZR-91-KPC,**  
 72 **obtained from one hospital in China and the GenBank, respectively.** The alignment was  
 73 performed using BLAST Ring Image Generator (BRIG). Homologous region (HR) was labelled.

74



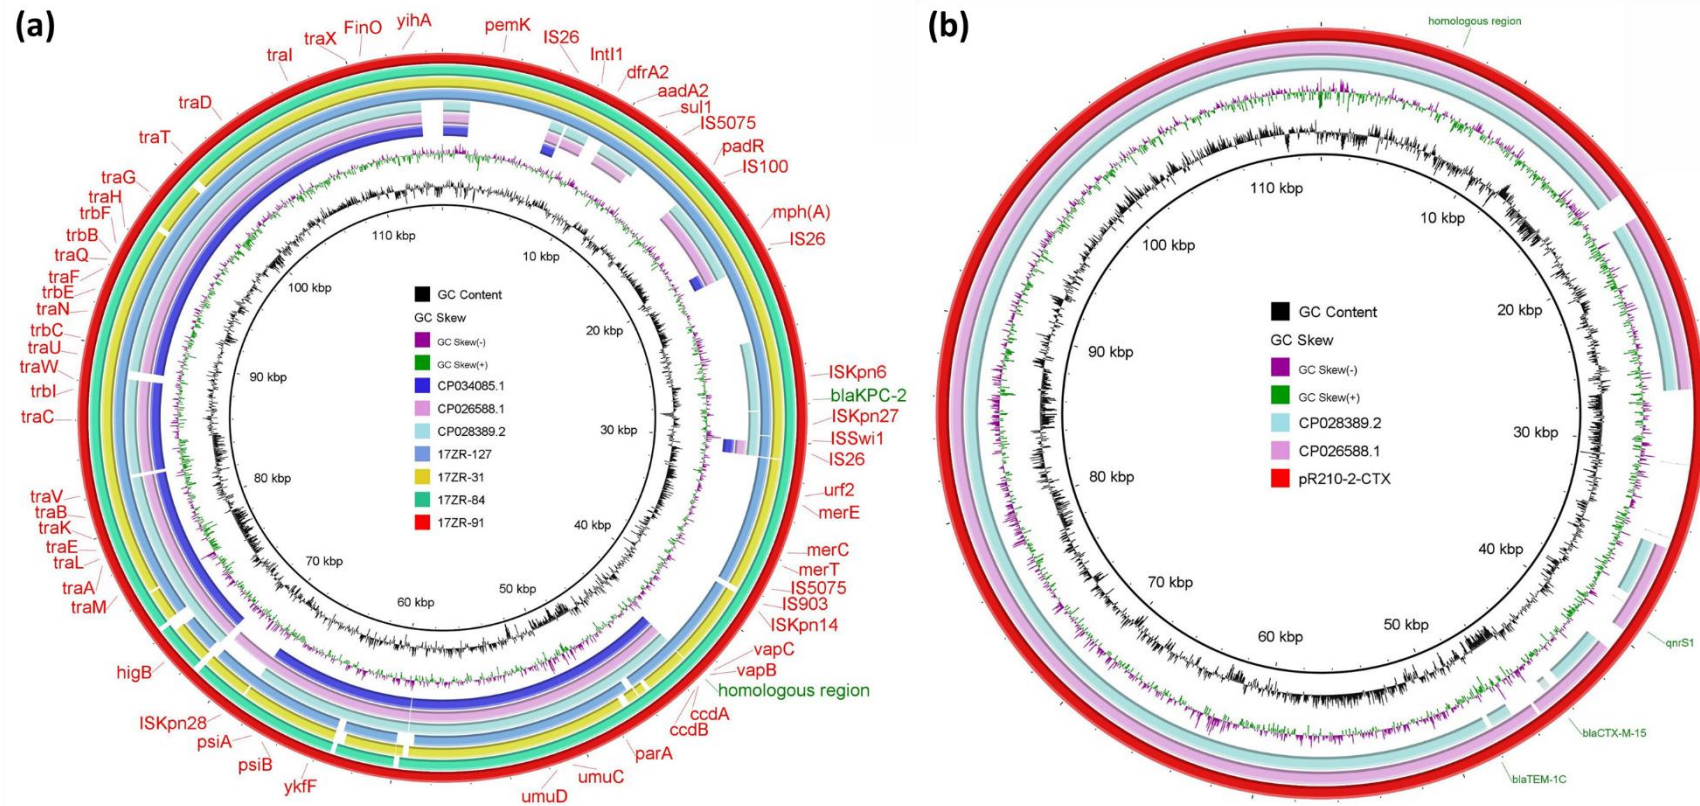

75

76 **Supplementary Figure S7. Alignment of *bla*<sub>KPC-2</sub>-bearing plasmid from *K. pneumoniae* strains carrying both p17ZR-91-Vir like and**  
 77 **p17ZR-91-KPC like genes. (a) Alignment of *bla*<sub>KPC-2</sub>-bearing plasmid from six *K. pneumoniae* strains carrying both p17ZR-91-Vir-like and**  
 78 **p17ZR-91-KPC-like genes. (b) Alignment of pR210-2-CTX like plasmid with those of the other two *K. pneumoniae* strains documented in the**  
 79 **Genbank which also carried the virulence plasmid. The alignment was performed using BLAST Ring Image Generator (BRIG). Four strains from**  
 80 **the same hospital exhibited highly similar p17ZR-91-KPC-like plasmids, whereas three strains from the GenBank carried a pR210-2-CTX**

- 81 (NZ\_CP034085.1)-like *bla*<sub>CTX-M</sub>-bearing plasmid with a backbone similar to that of p17ZR-91-KPC, but contain different MDR regions.
- 82 Homologous region (HR) was labelled.
